# Supplementary material for: The Single-Breath Diffusing Capacity of CO and NO in Healthy Children of European Descent
Source: PLoS One. 2014 Dec 16;9(12):e113177. doi: 10.1371/journal.pone.0113177 (PMC4267784; doi:10.1371/journal.pone.0113177)
Supplement: Appendix S2 — Excel worksheet. (XLSX) [file pone.0113177.s009.xlsx]

## Sheet: DLCO
CO diffusion and Methane dilution(10 s breath-hold )
Sex (1=male, 0=female):
Height (in cm):
Date of birth (dd-mm-yyyy)			Date of birth is needed for calculating age
Date of measurement (dd-mm-yyyy)			Date of measurement is needed for calculation of age
Measures GAMLSS	Measured value		Percentile score		Predicted value		5th percentile (LLN)		95th percentile (ULN)		Z-Score
Va (l)					0.274867		0.238263		0.313646
DL,CO (mmol/min/kPa)					2.95221		2.4297		3.51688
DL,CO hb-cor (mmol/min/kPa)					1.89102		1.57115		2.23547
DL,CO/Va (mmol/min/kPa/l)					3.35838		2.79499		3.96466
DL,CO/Va hb-cor (mmol/min/kPa/l)					3.60552		3.00959		4.24609
Measures Ordinary Least Squares regression	Measured value		Percentile score		Predicted value		5th percentile (LLN)		95th percentile (ULN)		Z-Score
Va (l)					0.275404		0.239702		0.316425
DL,CO (mmol/min/kPa)					2.94858		2.44853		3.55076
DL,CO hb-cor (mmol/min/kPa)					1.87358		1.56856		2.23791
DL,CO/Va (mmol/min/kPa/l)					3.34643		2.80624		3.99061
DL,CO/Va hb-cor (mmol/min/kPa/l)					3.59703		3.02536		4.27673

## Sheet: DLNO
NO diffusion and He dilution(5 s breath-hold)
Sex (1=male, 0=female):
Height (in cm):
Date of birth (dd-mm-yyyy)			Date of birth is needed for calculating age
Date of measurement (dd-mm-yyyy)			Date of measurement is needed for calculation of age
Measures GAMLSS	Measured value		Percentile score		Predicted value		5th percentile (LLN)		95th percentile (ULN)		Z-score
Va (l)					0.499603		0.434415		0.568582
DL,CO (mmol/min/kPa)					2.57032		2.14238		3.03058
DL,CO hb-cor (mmol/min/kPa)					1.89491		1.58706		2.23261
DL,CO/Va (mmol/min/kPa/l)					2.60319		2.21415		3.01836
DL,CO/Va hb-cor (mmol/min/kPa/l)					5.0465		4.29105		5.85281
DL,NO (mmol/min/kPa)					3.72289		3.10123		4.39164
DL,NO/Va (mmol/min/kPa/l)					3.55096		2.37664		4.72529
Vc (ml)					15.3303		12.3862		18.5341
Dm (ml/min/mmHg)	#DIV/0!		#DIV/0!		8.29289		6.42758		10.3543		#DIV/0!
DL,NO/DL,CO					2.56188		2.13107		2.99268
Measures Ordinary Least Squares regression	Measured value		Percentile score		Predicted value		5th percentile (LLN)		95th percentile (ULN)		Z-score
Va (l)					0.498415		0.435155		0.57087
DL,CO (mmol/min/kPa)					2.56545		2.15395		3.05556
DL,CO hb-cor (mmol/min/kPa)					1.83538		1.5451		2.18018
DL,CO/Va (mmol/min/kPa/l)					2.58586		2.21331		3.02113
DL,CO/Va hb-cor (mmol/min/kPa/l)					4.88989		4.18427		5.71449
DL,NO (mmol/min/kPa)					3.60532		3.02395		4.29846
DL,NO/Va (mmol/min/kPa/l)					3.45739		2.99175		3.9955
Vc (ml)					14.8404		12.1066		18.1914
Dm (ml/min/mmHg)	#DIV/0!		#DIV/0!		7.83303		6.15364		9.97076		#DIV/0!
DL,NO/DL,CO					2.51683		2.28975		2.76643
Dm is calculated from the equation:
Dm = (1/α-1/k)/(1/DL,NO-1/(k*DL,CO))	#DIV/0!
To calculate Dm, DL,CO and DL,NO have to be changed from mmol/min/kpa to ml/min/mmHg
2,99* DL,CO (mmol/min/kPa) = DL,CO (ml/min/mmHg)	0
2,99*DL,NO (mmol/min/kPa) = DL,NO (ml/min/mmHg)	0
α = DmNO/DmCO =	1.97
k = θNO/ θCO =	8.3841
θNO=	4.5
1/θCO =(1,3+0,0041*100)	1.71
Correction for sex:(females+males<15 y: 14,6/13,4; males≥15:1)	1.08955
1/θCO corrected for sex	1.86313
θCO corrected for sex	0.53673

## Sheet: Functions
LLN	0.05
ULN	0.95
GAMLSS
CO diffusion and Methane dilution(10 s breath-hold )		Distribution	mu	sigma	variance	shape	scale	nu=lambda	Z-score
Age (in years):	0
Va (l)		GAMMA	0.274867	0.0834365	0.000525964	143.644	0.00191352
DL,CO (mmol/min/kPa)		GAMMA	2.95221	0.112111	0.109544	79.5621	0.0371057
DL,CO hb-cor (mmol/min/kPa)		GAMMA	1.89102	0.106933	0.0408899	87.4536	0.0216232
DL,CO/Va (mmol/min/kPa/l)		GAMMA	3.35838	0.106013	0.126758	88.9783	0.0377438
DL,CO/Va hb-cor (mmol/min/kPa/l)		GAMMA	3.60552	0.104384	0.141646	91.7763	0.039286
NO diffusion and He dilution(5 s breath-hold)		Distribution	mu	sigma	variance	shape	scale	nu=lambda	Z-score
Age (in years):	0
Va (l)		GAMMA	0.499603	0.0816972	0.00166596	149.826	0.00333457
DL,CO (mmol/min/kPa)		GAMMA	2.57032	0.105181	0.0730888	90.3908	0.0284357
DL,CO hb-cor (mmol/min/kPa)		BCCG	1.89491	0.103535				0.45675
DL,CO/Va (mmol/min/kPa/l)		GAMMA	2.60319	0.0940079	0.0598879	113.154	0.0230056
DL,CO/Va hb-cor (mmol/min/kPa/l)		GAMMA	5.0465	0.0941733	0.225858	112.757	0.0447554
DL,NO (mmol/min/kPa)		GAMMA	3.72289	0.105503	0.154273	89.84	0.0414391
DL,NO/Va (mmol/min/kPa/l)		NORMAL	3.55096	0.713938
Vc (ml)		GAMMA	15.3303	0.122122	3.505	67.0522	0.228632
Dm (ml/min/mmHg)		GAMMA	8.29289	0.144293	1.43187	48.0297	0.172662		#DIV/0!
DL,NO/DL,CO		NORMAL	2.56188	0.261909
Ordinary least squares regression
CO diffusion and Methane dilution(10 s breath-hold )		Distribution	mu	Adjusted R2	SD	CV %	Z-score
Age (in years):	0
Va (l)			0.275404	0.939873	0.084412	6.41403
DL,CO (mmol/min/kPa)			2.94858	0.84108	0.112981	5.9556
DL,CO hb-cor (mmol/min/kPa)			1.87358	0.845332	0.10803	5.67751
DL,CO/Va (mmol/min/kPa/l)			3.34643	0.360175	0.10703	18.4232
DL,CO/Va hb-cor (mmol/min/kPa/l)			3.59703	0.410411	0.105225	17.9352
NO diffusion and He dilution(5 s breath-hold)		Distribution	mu	Adjusted R2	SD	CV %	Z-score
Age (in years):	0
Va (l)			0.498415	0.942466	0.082518	6.6601
DL,CO (mmol/min/kPa)			2.56545	0.879828	0.106289	5.889
DL,CO hb-cor (mmol/min/kPa)			1.83538	0.877001	0.104665	5.7771
DL,CO/Va (mmol/min/kPa/l)			2.58586	0.260747	0.094581	16.7203
DL,CO/Va hb-cor (mmol/min/kPa/l)			4.88989	0.326893	0.094741	16.5395
DL,NO (mmol/min/kPa)			3.60532	0.893914	0.106907	3.19103
DL,NO/Va (mmol/min/kPa/l)			3.45739	0.146839	0.087944	4.16575
Vc (ml)			14.8404	0.820328	0.123778	3.26574
Dm (ml/min/mmHg)			7.83303	0.848137	0.146704	3.38391	#DIV/0!
DL,NO/DL,CO			2.51683	0.21109	0.057487	3.71998

## Sheet: Example of calculation
	Example:
	The reference equation for DLCO10s is:
	exp(1.082553+0.017804*A+0.094838*S+1.541901*10^-7 *H^3)
	A 10-year-old boy with a height of 140 cm has a predicted DLCO of:
	exp(1.082553+0.017804*10+0.094838*1+1.541901*10^-07*140^3) =	5.92114
	where A is the age in years, S is the sex (1 for males and 0 for females), and H is the height in cm.
